1 ***In vitro* and *in vivo* interaction of caspofungin with isavuconazole against *Candida auris***  
2 **planktonic cells and biofilms**

3

4

5 Short title: Isavuconazole with caspofungin against *C. auris*

6

7 Fruzsina Nagy<sup>1,2</sup>, Zoltán Tóth<sup>1,2,3</sup>, Fanni Nyikos<sup>1</sup>, Lajos Forgács<sup>1,2</sup>, Ágnes Jakab<sup>4</sup>, Andrew M.  
8 Borman<sup>5,6</sup>, László Majoros<sup>1</sup>, Renátó Kovács<sup>1,7\*</sup>

9

10 <sup>1</sup> Department of Medical Microbiology, Faculty of Medicine, University of Debrecen, 4032  
11 Debrecen, Nagyerdei krt. 98., Hungary

12 <sup>2</sup> Doctoral School of Pharmaceutical Sciences, University of Debrecen, Nagyerdei krt. 98,  
13 4032 Debrecen, Hungary

14 <sup>3</sup> Department of Pharmacology and Pharmacotherapy, Faculty of Medicine, University of  
15 Debrecen, Nagyerdei krt. 98, 4032 Debrecen, Hungary

16 <sup>4</sup> Department of Molecular Biotechnology and Microbiology, Faculty of Science and  
17 Technology, Institute of Biotechnology, University of Debrecen, Debrecen, Hungary.

18 <sup>5</sup> UK National Mycology Reference Laboratory, Public Health England, Science Quarter,  
19 Southmead Hospital, Bristol BS10 5NB, UK

20 <sup>6</sup> Medical Research Council Centre for Medical Mycology, University of Exeter, Exeter EX4  
21 4QD, UK

22 <sup>7</sup> Department of Metagenomics, University of Debrecen, Nagyerdei krt. 98, 4032 Debrecen,  
23 Hungary

24

25 \*Corresponding author: Renátó Kovács; Department of Medical Microbiology, Faculty of  
26 Medicine, University of Debrecen, 4032 Debrecen, Nagyterdei krt. 98., Hungary, Phone: 00-  
27 36-52-255-425; e-mail: kovacs.renato@med.unideb.hu

28

29 **Abstract**

30 The *in vitro* and *in vivo* efficacy of caspofungin was determined in combination with  
31 isavuconazole against *Candida auris*. Drug–drug interactions were assessed utilising the  
32 fractional inhibitory concentration indices (FICIs), the Bliss independence model and an  
33 immunocompromised mouse model. Median planktonic minimum inhibitory concentrations  
34 (pMICs) of 23 *C. auris* isolates were between 0.5 and 2 mg/L and between 0.015 and 4 mg/L  
35 for caspofungin and isavuconazole, respectively. Median pMICs for caspofungin and  
36 isavuconazole in combination showed 2–128-fold and 2–256-fold decreases, respectively.  
37 Caspofungin and isavuconazole showed synergism in 14 out of 23 planktonic isolates (FICI  
38 range 0.03–0.5; Bliss cumulative synergy volume range 0–4.83). Median sessile MICs  
39 (sMIC) of 14 biofilm-forming isolates were between 32 and >32 mg/L and between 0.5 and  
40 >2 mg/L for caspofungin and isavuconazole, respectively. Median sMICs for caspofungin and  
41 isavuconazole in combination showed 0–128-fold and 0-512-fold decreases, respectively.  
42 Caspofungin and isavuconazole showed synergistic interaction in 12 out of 14 sessile isolates  
43 (FICI range 0.023–0.5; Bliss cumulative synergy volume range 0.13–234.32). In line with the  
44 *in vitro* findings, synergistic interactions were confirmed by *in vivo* experiments. The fungal  
45 kidney burden decreases were more than 3 log volumes in mice treated with combination of 1  
46 mg/kg caspofungin and 20 mg/kg isavuconazole daily; this difference was statistically  
47 significant compared with control mice ( $p < 0.001$ ). Despite the favourable effect of  
48 isavuconazole in combination with caspofungin, further studies are needed to confirm the  
49 therapeutic advantage of this combination when treating an infection caused by *C. auris*.

50

51 Keywords: *Candida auris*, biofilms, synergy, isavuconazole, mouse, echinocandin,

52

53 **1. Introduction**

54 Since its first identification more than 10 years ago, *Candida auris* has emerged as a global  
55 public health threat due to its ability to cause nosocomial outbreaks of invasive infections in  
56 health care facilities worldwide [1]. Previously, four major phylogenetically distinct lineages  
57 (South Asian, East Asian, South African and South American) emerged simultaneously, a  
58 phenomenon that highlights the global dissemination of this pathogen. In addition, a potential  
59 fifth clade (Iranian origin) has also been described in the recent past [2-3].

60 *C. auris* can colonise a variety of body sites and medical implants such as central venous  
61 catheters, where biofilm development is one of the most important complications [4]. Clinical  
62 studies have shown that indwelling devices were the source in 89% of *C. auris* bloodstream  
63 infections; these data emphasise the clinical importance of these sessile communities [5-6]. It  
64 is clear that *C. auris* has exceptionally high minimum inhibitory concentrations (MICs)  
65 against the three main classes of antifungals [7-9]; therefore, the potential biofilm-forming  
66 ability further complicates treatment [10]. For example, echinocandins – including  
67 caspofungin – are frequently administered for the treatment of invasive *C. auris* infections  
68 [11-12]. However, these drugs are not expected to be effective in biofilm-related *C. auris*  
69 diseases due to the 2–512-fold higher sessile MIC values to echinocandins [6]. The need for  
70 novel therapeutic approaches against *C. auris* is increasing, but the development of new  
71 antifungal drugs has decelerated. Therefore, a promising treatment strategy would be to  
72 administer antifungals in combination, an approach that can reduce the toxicity and improve  
73 the pharmacokinetics and the antifungal effect of drugs used, ultimately improving the  
74 prognosis of patients [13, 14].

75 In 2016, a new broad-spectrum antifungal drug, isavuconazole, was introduced in clinical  
76 practice; it has a favourable safety profile with high activity against a wide variety of fungal  
77 pathogens, but the activity of isavuconazole against *C. auris* is variable [15]. Nevertheless, a

78 multicenter study revealed that isavuconazole was not inferior relative to caspofungin for the  
79 primary treatment of candidaemia and invasive candidiasis [16]. Whether combinations of  
80 isavuconazole with echinocandins possess synergistic interactions against *C. auris*, especially  
81 against biofilms, has been poorly studied. Hence, we examined *in vitro* and *in vivo*  
82 combinations of isavuconazole and caspofungin against *C. auris* isolates derived from the  
83 four main clades.

84

## 85 **2. Material and Methods**

### 86 **2.1. Isolates**

87 Isolates of four different *C. auris* clades (South Asian, n = 9; East Asian, n = 4; South  
88 African, n = 5; South American, n = 5) were tested; their origin is listed in Supplementary  
89 Table 1. All isolates were identified to the species level by matrix-assisted laser  
90 desorption/ionisation time-of-flight mass spectrometry. Clade delineation was conducted by  
91 polymerase chain reaction (PCR) amplification and sequencing of the 28S ribosomal DNA  
92 (rDNA) gene and the internal transcribed spacer region 1, as described previously [17-18].

93

### 94 **2.2. Determination of the planktonic minimal inhibitory concentration**

95 The planktonic MIC (pMIC) was determined according to the recommendations proposed by  
96 the Clinical Laboratory Standards Institute M27-A3 protocol [19]. Susceptibility to  
97 caspofungin pure powder (Molcan, Toronto, Canada) and isavuconazole pure powder (Merck,  
98 Budapest, Hungary) was determined in RPMI-1640 (with L-glutamine and without  
99 bicarbonate, pH 7.0, and with MOPS; Merck, Budapest, Hungary). The drug concentrations  
100 tested ranged from 0.008 to 4 mg/L for isavuconazole and from 0.03 to 2 mg/L for  
101 caspofungin. pMICs were determined as the lowest drug concentration that produces at least  
102 50% growth reduction compared with the growth control. pMICs represent three independent  
103 experiments per isolate and are expressed as the median. *Candida parapsilosis* ATCC 22019  
104 and *Candida krusei* ATCC 6258 were used as quality control strains.

105

### 106 **2.3. Biofilm development**

107 *C. auris* isolates were subcultured on Sabouraud dextrose agar (Lab M Ltd., Bury, United  
108 Kingdom). After 48 hours, fungal cells were harvested by centrifugation (3000 g for 5 min)  
109 and were washed three times in sterile physiological saline. After the final washing step,

110 pellets were resuspended in physiological saline (ca. 5–6 mL) and were counted using a  
111 Bürker chamber (Hirschmann Laborgeräte GmbH & Co. KG, Eberstadt, Germany). The  
112 final density of inoculums was adjusted in RPMI-1640 broth to  $1 \times 10^6$  cells/mL and 100  $\mu$ L  
113 aliquots were inoculated onto flat-bottom 96-well sterile microtitre plates (TPP, Trasadingen,  
114 Switzerland) and then incubated statically at 37°C for 24 hours to produce one-day-old  
115 biofilms [20–22].

116

#### 117 **2.4. Determination of the minimal inhibitory concentration of one-day-old biofilms**

118 The examined caspofungin concentrations for sessile MIC (sMIC) determination ranged from  
119 1 to 32 mg/L, while the examined isavuconazole concentrations ranged from 0.008 to 2 mg/L.  
120 One-day-old biofilms were washed three times with sterile physiological saline.  
121 Subsequently, sMICs were determined in RPMI-1640 using a metabolic activity change–  
122 based XTT assay. The percentage change in metabolic activity was calculated based on  
123 absorbance ( $A$ ) at 492 nm as  $100\% \times (A_{\text{well}} - A_{\text{background}}) / (A_{\text{drug-free well}} - A_{\text{background}})$ . sMICs were  
124 defined as the lowest drug concentration resulting in at least a 50% metabolic activity  
125 decrease compared with untreated control cells [20–22]. sMICs represent three independent  
126 experiments per isolate and are expressed as the median.

127

#### 128 **2.5. Evaluation of interactions by fractional inhibitory concentration index and the Bliss** 129 **independence model**

130 Interactions between caspofungin and isavuconazole were assessed by a two-dimensional  
131 broth microdilution chequerboard assay [20–22]. Interactions were then analysed by  
132 determining the fractional inhibitory concentration index (FICI) and using the Bliss  
133 independence model [14, 20–23]. In the case of planktonic cells, the tested concentration  
134 ranged from 0.008 to 2 mg/L for isavuconazole and from 0.015 to 1 mg/L for caspofungin.

135 For biofilms, the examined caspofungin concentrations ranged from 1 to 32 mg/L, while the  
136 tested isavuconazole concentrations ranged from 0.008 to 2 mg/L. FICIs were calculated with  
137 the widely used following formula:  $\Sigma\text{FIC} = \text{FIC}_A + \text{FIC}_B = [(\text{MIC}_A^{\text{comb}}/\text{MIC}_A^{\text{alone}})] +$   
138  $[(\text{MIC}_B^{\text{comb}}/\text{MIC}_B^{\text{alone}})]$ , where  $\text{MIC}_A^{\text{alone}}$  and  $\text{MIC}_B^{\text{alone}}$  stand for MICs of drugs A and B  
139 when used alone, and  $\text{MIC}_A^{\text{comb}}$  and  $\text{MIC}_B^{\text{comb}}$  represent the MICs of drugs A and B in  
140 combination at isoeffective combinations, respectively [14, 20–23]. FICIs were determined as  
141 the lowest  $\Sigma\text{FIC}$ . MICs of the drugs alone and of all isoeffective combinations were  
142 determined as the lowest concentration resulting in at least 50% metabolic activity reduction  
143 compared with the untreated control biofilms. If the obtained MIC was higher than the highest  
144 tested drug concentration, the next highest twofold concentration was considered the MIC.  
145 FICIs  $\leq 0.5$  were defined as synergistic, between  $> 0.5$  and 4 as indifferent, and  $> 4$  as  
146 antagonistic [14, 20–23]. FICIs were determined in three independent experiments and are  
147 presented as the median.

148 To further evaluate caspofungin–isavuconazole interactions, MacSynergy II analysis was  
149 applied; this approach employs the Bliss independence algorithm in a Microsoft Excel–based  
150 interface to determine synergy [20–24]. The Bliss independence algorithm is a well-described  
151 method for the examination of the nature of drug–drug interactions. Briefly, the Bliss  
152 independence algorithm calculates the difference ( $\Delta E$ ) in the predicted percentage of growth  
153 ( $E_{\text{ind}}$ ) and the experimentally observed percentage of growth ( $E_{\text{exp}}$ ) to define the interaction of  
154 the drugs used in combination.  $E_{\text{ind}}$  is calculated with the equation  $E_{\text{ind}} = E_A \times E_B$ , where  $E_{\text{ind}}$   
155 is the predicted percentage of growth that defines the effect of combination when the drugs  
156 are acting alone.  $E_A$  and  $E_B$  are the experimental percentages of growth with each drug acting  
157 alone. The MacSynergy II model uses interaction volumes and defines positive volumes as  
158 synergistic and negative volumes as antagonistic. The obtained E values of each combination  
159 are presented on the z-axis in the three-dimensional plot. Synergy or antagonism is significant



160 if the interaction log volumes are higher than 2 or lower than 2, respectively [14, 24].  
161 Log volume values between > 2 and 5, between > 5 and 9, and > 9 should be considered as  
162 minor synergy, moderate synergy and strong synergy, respectively. The corresponding  
163 negative values define minor, moderate and strong antagonism, respectively. The synergy  
164 volumes were calculated at the 95% confidence level [24].

165

## 166 **2.6. Infection model**

167 Pathogen-free female BALB/c mice weighing 22 to 24 g were used for the *in vivo*  
168 experiments. The Guidelines for the Care and Use of Laboratory Animals were strictly  
169 followed during the maintenance of mice. Animals were allowed access to food and water *ad*  
170 *libitum*. *In vivo* experiments were approved by the Animal Care Committee of the University  
171 of Debrecen (permission number is 12/2014). An immunocompromised mouse disseminated  
172 model was used for the studies. The animals were rendered neutropenic by intraperitoneal  
173 injection of cyclophosphamide (Endoxan, Baxter, Deerfield, IL, United States) 4 days (150  
174 mg/kg body weight) and 1 day (100 mg/kg body weight) before infection and then 2 and 4  
175 days postinfection (100 mg/kg body weight) [25]. Mice were infected intravenously through  
176 the lateral tail vein with  $1-1.3 \times 10^7$  colony-forming units (CFU) in 200  $\mu$ L physiological  
177 saline [25]. The inoculum density was confirmed by plating serial dilutions on Sabouraud  
178 dextrose agar. Mice were divided into four groups (8 mice per group): (i) untreated control;  
179 (ii) 1 mg/kg/day caspofungin; (iii) 20 mg/kg/day isavuconazole; and (iv) 1 mg/kg/day  
180 caspofungin + 20 mg/kg/day isavuconazole. Cresemba<sup>®</sup> intravenous formulation (Basilea  
181 Pharmaceutica Ltd., Basel, Switzerland) was used for isavuconazole treatment. All treatment  
182 arms were given intraperitoneally and started 24 hours postinfection. In the case of  
183 caspofungin–isavuconazole combination, isavuconazole doses were administered 1 hour after  
184 the caspofungin treatments. Control mice were given 0.5 mL sterile physiological saline

185 intraperitoneally. At 6 days postinfection, animals were euthanised; subsequently, the kidneys  
186 of each mouse were removed, weighed and homogenised aseptically. Homogenates were  
187 serially diluted tenfold and 100  $\mu$ L aliquots were plated onto Sabouraud dextrose agar for  
188 viable fungal colony counts after incubation for 48 hours at 37°C [25]. The lower limit of  
189 detection was 500 CFU/kidney. The kidney burden was analysed using the Kruskal–Wallis  
190 test with Dunn’s post-test (GraphPad Prism 6.05.). Significance was defined as  $p < 0.05$ .

191

192

### 193 3. Results

194 The median and the range of MICs for planktonic and sessile *C. auris* isolates are shown in  
195 Table 1. The planktonic form of the tested isolates was considered to be susceptible to  
196 caspofungin based on the tentative MIC breakpoint recommended by the Centers for Disease  
197 Control and Prevention ( $\geq 2$  mg/L) [26]. By the microdilution method, the 23 isolates  
198 exhibited pMICs for caspofungin alone from 0.5 to 2 mg/L, with a pMIC<sub>50</sub>, pMIC<sub>90</sub> and  
199 geometric mean pMIC of 1, 2 and 1.13 mg/L, respectively. In the case of isavuconazole,  
200 pMICs were from 0.015 to 4 mg/L, with a pMIC<sub>50</sub>, pMIC<sub>90</sub> and geometric mean pMIC of 0.5,  
201 2 and 0.33 mg/L, respectively. Fourteen out of 23 isolates formed biofilms, which showed  
202 significantly higher resistance to caspofungin and isavuconazole compared with planktonic  
203 cells (Table 1). sMICs for caspofungin alone were from 2 to  $> 32$  mg/L, with a sMIC<sub>50</sub>,  
204 sMIC<sub>90</sub> and geometric mean sMIC of  $> 32$ ,  $> 32$  and 45.25 mg/L, respectively (64 mg/L was  
205 used for geometric mean sMIC analysis in the case of sMIC  $> 32$  mg/L). The biofilm-forming  
206 isolates exhibited sMICs for isavuconazole alone from 0.5 to  $> 2$  mg/L, with a sMIC<sub>50</sub>,  
207 sMIC<sub>90</sub> and geometric mean sMIC of  $> 2$ ,  $> 2$  and 3.12 mg/L, respectively (4 mg/L was used  
208 for geometric mean sMIC analysis in the case of sMIC  $> 2$  mg/L) (Table 1).

209 The median pMICs observed in combination showed a 2–128-fold and a 2–256-fold reduction  
210 for caspofungin and isavuconazole, respectively. A similar marked reduction in median  
211 sMICs was observed for biofilms (a 0–128-fold and a 0–512-fold decrease for caspofungin  
212 and isavuconazole, respectively) (Table 1).

213 Table 2 summarises the *in vitro* interactions between caspofungin and isavuconazole based on  
214 the median FICIs. An antagonistic interaction was never observed (all FICIs  $\leq 4$ ). Using a  
215 two-dimensional broth microdilution chequerboard assay and FICI calculation, the nature of  
216 the caspofungin–isavuconazole interaction was synergistic for 61% of the planktonic isolates,  
217 with median FICIs from 0.03 to 0.5 and a mean of the median FICI of 0.34. In the case of

218 sessile cells, synergism was observed for 86% of the 14 biofilm-forming isolates, with median  
219 FICIs from 0.029 to 0.5 and a mean of the median FICI of 0.14 (Table 2).  
220 FICI calculation involves Loewe additivity-based analysis assuming that both drugs have the  
221 same mechanism of action, while the Bliss independence-based MacSynergy II program does  
222 not have this assumption. Figure 1 shows the dose-response surfaces for caspofungin-  
223 isavuconazole generated with MacSynergy II. Based on clade-specific cumulative log  
224 volumes, the combination of caspofungin and isavuconazole exerted minor synergy (the  
225 synergy log volume was 4.83) against planktonic isolates derived from the South African  
226 clade (Figure 1C). For the South Asian, South American and East Asian clades, the synergy  
227 log volumes were zero, indicating indifferent interactions (Figure 1A, B and D). In the case of  
228 biofilms, 77.2, 23.21 and 234.32 cumulative synergy log volumes were observed for South  
229 African, South Asian and East Asian clades, respectively, indicating strong synergistic  
230 interactions (Figure 1E, G and H). By contrast, the South American clade exhibited an  
231 indifferent interaction, with a cumulative synergy log volume of 0.13 (Figure 1F). Based on  
232 the evaluation of *in vitro* combinations, the data derived from the FICI calculation correlate  
233 with the MacSynergy analysis primarily in the case of biofilms. Although the combination of  
234 caspofungin and isavuconazole was synergistic or considerably reduced the amount of drug  
235 needed in some instances, the observed results may show strain specificity within clades,  
236 especially in the case of planktonic cells.

237 To further evaluate the *in vivo* applicability of the caspofungin and isavuconazole  
238 combination, representative isolates were chosen where synergistic and indifferent  
239 interactions were observed *in vitro*, respectively. The results of the *in vivo* experiments are  
240 shown in Figure 2. One mg/kg daily caspofungin treatment decreased the fungal kidney  
241 burden in the case of the tested isolates; however, this therapeutic strategy was not  
242 statistically different compared with untreated control mice ( $p > 0.05$ ). The 20 mg/kg/day

243 isavuconazole treatment proved to be statistically ineffective against the tested *C. auris*  
244 isolates, especially in the case of isolate 13112 ( $p > 0.05$ ). It is noteworthy that the fungal  
245 tissue burden decreases were higher than the three log decreases in mice treated with a daily  
246 combination of 1 mg/kg caspofungin and 20 mg/kg isavuconazole, which was statistically  
247 significant compare with control mice ( $p < 0.001$ ) (Figure 2).

248

249

#### 250 4. Discussion

251 The impending challenge of antifungal resistance and newly emerged fungal pathogens  
252 necessitates bold and innovative therapeutic solutions [27]. In recent years, combination-  
253 based antifungal treatments have become a promising therapeutic approach, especially against  
254 multidrug-resistant fungal species such as *C. auris*. Based on previous susceptibility studies  
255 against *C. auris*, the efficacy of *in vitro* combinations has shown high variability; in addition,  
256 the degree of activity is highly strain – or rather clade – specific [28–30].

257 Isavuconazole is recommended primarily for the treatment of invasive aspergillosis and  
258 mucormycosis; however, it has also exerted variable *in vitro* activity against several *Candida*  
259 species [15]. Sanglard and Coste (2016) reported that the activity range of isavuconazole is  
260 similar to that of voriconazole against the *Candida* strains they tested, findings that were  
261 confirmed by Marcos-Zambrano *et al.* (2018), who showed high *in vitro* activity of  
262 isavuconazole against clinically relevant *Candida* species, particularly against *C. albicans*  
263 [31, 32]. Desnos-Ollivier *et al.* (2019) reported an isavuconazole MIC of 0.015 mg/L against  
264 planktonic *C. auris*; however, they tested only two strains [33]. Regarding clinical findings,  
265 the ACTIVE trial compared intravenous isavuconazole to intravenous caspofungin followed  
266 by oral isavuconazole in a phase 3 randomised, double-blind clinical trial for patients with  
267 *Candida* bloodstream infection. These results support the use of isavuconazole as a potential  
268 therapy for candidiasis [16].

269 To the best of our knowledge, this is the first study to examine the *in vitro* and *in vivo*  
270 combined effect of isavuconazole and caspofungin against *C. auris* strains derived from four  
271 different lineages focusing on both planktonic and sessile susceptibility. In the case of  
272 *Aspergillus* spp., this combination showed synergistic interaction in 13% of tested strains  
273 [34]. In our study, we found *in vitro* synergy for the caspofungin–isavuconazole combination  
274 using chequerboard microdilution, especially based on FICI determination, which was

275 definitely pronounced in the case of one-day-old biofilms. Katragkou *et al.* [35] showed  
276 synergistic interactions between isavuconazole and micafungin against *C. albicans*, *Candida*  
277 *parapsilosis* and *Candida krusei* using the Bliss independence model (the degree of synergy  
278 ranged from 1.8% to 16.7%), which was confirmed by time-kill curves, especially against *C.*  
279 *albicans* and *C. parapsilosis*. Voriconazole exerted synergistic interaction with caspofungin  
280 or other echinocandins against *C. auris* isolates using the FICI [36]. In a recent study, Pfaller  
281 *et al.* [37] examined the *in vitro* activity of voriconazole or isavuconazole in combination with  
282 anidulafungin; synergy or partial synergy was observed in 14% and 61% of the isolates with  
283 the combination of anidulafungin plus voriconazole and in 19% and 53% of isolates for the  
284 combination of anidulafungin plus isavuconazole. It is noteworthy that O'Brien *et al.* [29]  
285 examined four pan-resistant *C. auris* strains derived from a New York outbreak to evaluate  
286 whether they are susceptible to combinations of antifungals. Based on their results,  
287 flucytosine combinations with either amphotericin B, azoles or echinocandins exhibited the  
288 highest efficacy [29]. However, the combination of azoles with echinocandins had no superior  
289 effect compared with monotherapy [29].

290 The number of *in vivo* experiments focusing on combination-based therapy against *C. auris* is  
291 strongly limited. In the only published *in vivo* combination-based experiments, Eldesouky *et*  
292 *al.* [38] observed that the examined sulfamethoxazole–voriconazole combination enhanced  
293 the survival of *Caenorhabditis elegans* nematodes infected with *C. auris* by nearly 70%. Our  
294 study is the first that has examined the effect of caspofungin in combination with  
295 isavuconazole *in vivo* at clinically relevant concentrations using an immunocompromised  
296 mouse model. Although caspofungin alone produced a remarkable reduction in the kidney  
297 fungal burden, only its combination with isavuconazole was statistically superior compared  
298 with the untreated control ( $p < 0.001$ ).

299 The multidrug resistance phenotype is a well-known characteristic for *C. auris*; it may be  
300 more pronounced in biofilms and further complicate treatment [6]. Based on previous  
301 susceptibility testing, amphotericin B, fluconazole, voriconazole, anidulafungin, micafungin  
302 and caspofungin could not completely eradicate *C. auris* biofilms *in vitro*, increasing the need  
303 for effective combination therapies [39]. Certain non-antifungal agents in combination with  
304 traditional antifungal drugs have been tested to eradicate *C. auris* biofilms with variable  
305 efficacy [21, 22, 40]. However, to date there is no experimental evidence about the efficacy of  
306 antifungal drug–drug combinations against *C. auris* biofilms. In our study, we found a  
307 prominent synergistic interaction between caspofungin and isavuconazole against biofilms for  
308 three out of the four clades examined. We observed indifferent interaction only in the case of  
309 two hospital-derived isolates from the South American clade (13112, 13108). The origin of  
310 these strains may explain the significantly higher resistance against drugs tested and the  
311 observed indifferent interaction compared to other isolates.

312 It should be pointed out that our study had a limitation, namely the choice of the endpoint for  
313 FICI-based assessment of antifungal combinations. To date, there is no a solid consensus  
314 about which endpoint should be used [23, 24, 30]. In addition, for MacSynergy-based  
315 evaluation, there is no endpoint at all, and the nature of the interaction is calculated only  
316 based on the percentage of growth at given concentrations [24, 30]. Despite this limitation,  
317 the therapeutic potential of the caspofungin and isavuconazole in combinations is  
318 unquestionable, which was definitely confirmed against *C. auris* biofilms and our *in vivo*  
319 experiments.

320 In summary, the presented synergistic combinations correspond to clinically achievable and  
321 safe drug concentrations. Our findings suggest that administration of the caspofungin–  
322 isavuconazole combination may help to expand the therapeutic options against *C. auris*.



323 Nevertheless, the more extensive *in vivo* correlation and significant clinical relevance of these  
324 *in vitro* and *in vivo* results warrants further studies, especially in the case of biofilms.

### 325 **Funding**

326 Renátó Kovács was supported by the EFOP-3.6.3-VEKOP-16-2017-00009 program, OTKA  
327 Bridging Fund and FEMS Research and Training Grant (FEMS-GO-2019-502). Zoltán Tóth  
328 and Fruzsina Nagy were supported by the ÚNKP-19-3 and ÚNKP-20-3 New National  
329 Excellence Program of the Ministry for Innovation and Technology.

330

### 331 **Competing interests**

332 László Majoros has received conference travel grants from MSD, Astellas, Pfizer and Cidara.  
333 All other authors declare no competing interests.

334

### 335 **Ethical approval**

336 Not required.

337

338

339 **5. References**

- 340 1. Meis JF, Chowdhary A. *Candida auris*: a global fungal public health threat. Lancet  
341 Infect Dis. 2018;18:1298-99. doi: 10.1016/S1473-3099(18)30609-1  
342
- 343 2. Lockhart SR, Etienne KA, Vallabhaneni S, Farooqi J, Chowdhary A, Govender NP,  
344 Colombo AL, Calvo B, Cuomo CA, Desjardins CA, Berkow EL, Castanheira M, Magobo RE,  
345 Jabeen K, Asghar RJ, Meis JF, Jackson B, Chiller T, Litvintseva AP. Simultaneous  
346 Emergence of Multidrug-Resistant *Candida auris* on 3 Continents Confirmed by Whole-  
347 Genome Sequencing and Epidemiological Analyses. Clin Infect Dis. 2017;64:134-140. doi:  
348 10.1093/cid/ciw691.  
349
- 350 3. Chow NA, de Groot T, Badali H, Abastabar M, Chiller TM, Meis JF. Potential Fifth  
351 Clade of *Candida auris*, Iran, 2018. Emerg Infect Dis. 2019;25:1780-81. doi:  
352 10.3201/eid2509.190686.  
353
- 354 4. Kean R, Ramage G. Combined Antifungal Resistance and Biofilm Tolerance: the  
355 Global Threat of *Candida auris*. mSphere. 2019;4:e00458-19. doi: 10.1128/mSphere.00458-  
356 19  
357
- 358 5. Sayeed MA, Farooqi J, Jabeen K, Mahmood SF. Comparison of risk factors and  
359 outcomes of *Candida auris* candidemia with non-*Candida auris* candidemia: A retrospective  
360 study from Pakistan. Med Mycol. 2020;58:721-29. doi: 10.1093/mmy/myz112  
361
- 362 6. Horton MV, Nett JE. *Candida auris* infection and biofilm formation: going beyond the  
363 surface. Curr Clin Microbiol Rep. 2020;7:51-6. doi: 10.1007/s40588-020-00143-7

364

365 7. Arensman K, Miller JL, Chiang A, Mai N, Levato J, LaChance E, Anderson M,  
366 Beganovic M, Dela Pena J. Clinical Outcomes of Patients Treated for *Candida auris*  
367 Infections in a Multisite Health System, Illinois, USA. *Emerg Infect Dis.* 2020;26:876-80.  
368 doi: 10.3201/eid2605.191588.

369

370 8. Lockhart SR. *Candida auris* and multidrug resistance: Defining the new normal.  
371 *Fungal Genet Biol.* 2019;131:103243. doi: 10.1016/j.fgb.2019.103243.

372

373 9. Chowdhary A, Prakash A, Sharma C, Kordalewska M, Kumar A, Sarma S, Tarai B,  
374 Singh A, Upadhyaya G, Upadhyay S, Yadav P, Singh PK, Khillan V, Sachdeva N, Perlin DS,  
375 Meis JF. A multicentre study of antifungal susceptibility patterns among 350 *Candida auris*  
376 isolates (2009-17) in India: role of the ERG11 and FKS1 genes in azole and echinocandin  
377 resistance. *J Antimicrob Chemother.* 2018;73:891-99. doi: 10.1093/jac/dkx480

378

379 10. Romera D, Aguilera-Correa JJ, Gadea I, Viñuela-Sandoval L, García-Rodríguez J,  
380 Esteban J. *Candida auris*: a comparison between planktonic and biofilm susceptibility to  
381 antifungal drugs. *J Med Microbiol.* 2019;68:1353-58. doi: 10.1099/jmm.0.001036.

382

383 11. Singhal T, Kumar A, Borade P, Shah S, Soman R. Successful treatment of *C. auris*  
384 shunt infection with intraventricular caspofungin. *Med Mycol Case Rep.* 2018;22:35-7. doi:  
385 10.1016/j.mmcr.2018.08.005.

386

- 387 12. Cortegiani A, Misseri G, Fasciana T, Giammanco A, Giarratano A, Chowdhary A.  
388 Epidemiology, clinical characteristics, resistance, and treatment of infections by *Candida*  
389 *auris*. J Intensive Care. 2018;6:69. doi: 10.1186/s40560-018-0342-4.  
390
- 391 13. Kontoyiannis DP, Lewis RE. Toward more effective antifungal therapy: the prospects  
392 of combination therapy. Br J Haematol. 2004;126:165-75. doi: 10.1111/j.1365-  
393 2141.2004.05007.x  
394
- 395 14. Bidaud AL, Schwarz P, Herbreteau G, Dannaoui E. Techniques for the Assessment of  
396 *In Vitro* and *In Vivo* Antifungal Combinations. J Fungi (Basel). 2021;7:113. doi:  
397 10.3390/jof7020113.  
398
- 399 15. Ellsworth M, Ostrosky-Zeichner L. Isavuconazole: Mechanism of Action, Clinical  
400 Efficacy, and Resistance. J Fungi (Basel). 2020;6:324. doi: 10.3390/jof6040324.  
401
- 402 16. Kullberg BJ, Viscoli C, Pappas PG, Vazquez J, Ostrosky-Zeichner L, Rotstein C,  
403 Sobel JD, Herbrecht R, Rahav G, Jaruratanasirikul S, Chetchotisakd P, Van Wijngaerden E,  
404 De Waele J, Lademacher C, Engelhardt M, Kovanda L, Croos-Dabrera R, Fredericks C,  
405 Thompson GR. Isavuconazole Versus Caspofungin in the Treatment of Candidemia and Other  
406 Invasive *Candida* Infections: The ACTIVE Trial. Clin Infect Dis. 2019;68:1981-89. doi:  
407 10.1093/cid/ciy827  
408
- 409 17. Borman AM, Szekeley A, Johnson EM. Comparative Pathogenicity of United Kingdom  
410 Isolates of the Emerging Pathogen *Candida auris* and Other Key Pathogenic *Candida*  
411 Species. mSphere. 2016;1:e00189-16. doi: 10.1128/mSphere.00189-16.

412

413 18. Borman AM, Szekely A, Johnson EM. Isolates of the emerging pathogen *Candida*  
414 *auris* present in the UK have several geographic origins. *Med Mycol.* 2017;55:563-67. doi:  
415 10.1093/mmy/myw147.

416

417 19. Clinical and Laboratory Standards Institute. Reference Method for Broth Dilution  
418 Antifungal Susceptibility Testing of Yeasts. Approved Standard, 3rd ed.; M27-A3; CLSI:  
419 Wayne, PA, USA, 2008.

420

421 20. Nagy F, Tóth Z, Daróczy L, Székely A, Borman AM, Majoros L, Kovács R. Farnesol  
422 increases the activity of echinocandins against *Candida auris* biofilms. *Med Mycol.*  
423 2020;58:404-7. doi: 10.1093/mmy/myz057.

424

425 21. Nagy F, Vitális E, Jakab Á, Borman AM, Forgács L, Tóth Z, Majoros L, Kovács R. In  
426 vitro and *in vivo* Effect of Exogenous Farnesol Exposure Against *Candida auris*. *Front*  
427 *Microbiol.* 2020;11:957. doi: 10.3389/fmicb.2020.00957.

428

429 22. Kovács R, Nagy F, Tóth Z, Forgács L, Tóth L, Váradi G, Tóth GK, Vadászi K,  
430 Borman AM, Majoros L, Galgóczy L. The Neosartorya fischeri Antifungal Protein 2  
431 (NFAP2): A New Potential Weapon against Multidrug-Resistant *Candida auris* Biofilms. *Int*  
432 *J Mol Sci.* 2021;22:771. doi: 10.3390/ijms22020771.

433

434 23. Meletiadiis J, Verweij PE, TeDorsthorst DT, Meis JF, Mouton JW. Assessing *in vitro*  
435 combinations of antifungal drugs against yeasts and filamentous fungi: comparison of

436 different drug interaction models. *Med Mycol.* 2005;43:133-52. doi:  
437 10.1080/13693780410001731547.

438

439 24. Prichard MN, Shipman C Jr. A three-dimensional model to analyze drug-drug  
440 interactions. *Antiviral Res.* 1990;14:181-205. doi: 10.1016/0166-3542(90)90001-n.

441

442 25. Forgács L, Borman AM, Prépost E, Tóth Z, Kardos G, Kovács R, Szekely A, Nagy F,  
443 Kovacs I, Majoros L. Comparison of *in vivo* pathogenicity of four *Candida auris* clades in a  
444 neutropenic bloodstream infection murine model. *Emerg Microbes Infect.* 2020;9:1160-9. doi:  
445 10.1080/22221751.2020.1771218.

446

447 26. Centers for Disease Control and Prevention. Antifungal Susceptibility Testing and  
448 Interpretation. 2020. Available online: <https://www.cdc.gov/fungal/candida-auris/c-auris-antifungal.html> (accessed on 29 May 2020).

450

451 27. Roemer T, Krysan DJ. Antifungal drug development: challenges, unmet clinical needs,  
452 and new approaches. *Cold Spring Harb Perspect Med.* 2014;4:a019703. doi:  
453 10.1101/cshperspect.a019703.

454

455 28. Wu Y, Totten M, Memon W, Ying C, Zhang SX. *In Vitro* Antifungal Susceptibility of  
456 the Emerging Multidrug-Resistant Pathogen *Candida auris* to Miltefosine Alone and in  
457 Combination with Amphotericin B. *Antimicrob Agents Chemother.* 2020;64:e02063-19. doi:  
458 10.1128/AAC.02063-19.

459

- 460 29. O'Brien B, Chaturvedi S, Chaturvedi V. In Vitro Evaluation of Antifungal Drug  
461 Combinations against Multidrug-Resistant *Candida auris* Isolates from New York Outbreak.  
462 Antimicrob Agents Chemother. 2020;64:e02195-19. doi: 10.1128/AAC.02195-19.  
463
- 464 30. Schwarz P, Bidaud AL, Dannaoui E. *In vitro* synergy of isavuconazole in combination  
465 with colistin against *Candida auris*. Sci Rep. 2020;10:21448. doi: 10.1038/s41598-020-  
466 78588-5.  
467
- 468 31. Sanglard D, Coste AT. Activity of Isavuconazole and Other Azoles against *Candida*  
469 Clinical Isolates and Yeast Model Systems with Known Azole Resistance Mechanisms.  
470 Antimicrob Agents Chemother. 2015;60:229-38. doi: 10.1128/AAC.02157-15.  
471
- 472 32. Marcos-Zambrano LJ, Gómez A, Sánchez-Carrillo C, Bouza E, Muñoz P, Escribano  
473 P, Guinea J. Isavuconazole is highly active in vitro against *Candida* species isolates but shows  
474 trailing effect. Clin Microbiol Infect. 2018;24:1343.e1-1343.e4. doi:  
475 10.1016/j.cmi.2018.07.006.  
476
- 477 33. Desnos-Ollivier M, Bretagne S, Boullié A, Gautier C, Dromer F, Lortholary O; French  
478 Mycoses Study Group. Isavuconazole MIC distribution of 29 yeast species responsible for  
479 invasive infections (2015-2017). Clin Microbiol Infect. 2019;25:634.e1-634.e4. doi:  
480 10.1016/j.cmi.2019.02.007.  
481
- 482 34. Raffetin A, Courbin V, Jullien V, Dannaoui E. *In Vitro* Combination of Isavuconazole  
483 with Echinocandins against Azole-Susceptible and -Resistant *Aspergillus* spp. Antimicrob  
484 Agents Chemother. 2017;62:e01382-17. doi: 10.1128/AAC.01382-17.

485

486 35. Katragkou A, McCarthy M, Meletiadis J, Hussain K, Moradi PW, Strauss GE, Myint  
487 KL, Zaw MH, Kovanda LL, Petraitiene R, Roilides E, Walsh TJ, Petraitis V. *In vitro*  
488 combination therapy with isavuconazole against *Candida* spp. *Med Mycol.* 2017;55:859-68.  
489 doi: 10.1093/mmy/myx006.

490

491 36. Fakhim H, Chowdhary A, Prakash A, Vaezi A, Dannaoui E, Meis JF, Badali H. In  
492 Vitro Interactions of Echinocandins with Triazoles against Multidrug-Resistant *Candida auris*.  
493 *Antimicrob Agents Chemother.* 2017;61:e01056-17. doi: 10.1128/AAC.01056-17.

494

495 37. Pfaller MA, Messer SA, Deshpande LM, Rhomberg PR, Utt EA, Castanheira M.  
496 Evaluation of Synergistic Activity of Isavuconazole or Voriconazole plus Anidulafungin and  
497 the Occurrence and Genetic Characterisation of *Candida auris* Detected in a Surveillance  
498 Program. *Antimicrob Agents Chemother.* 2021; AAC.02031-20. doi: 10.1128/AAC.02031-  
499 20.

500

501 38. Eldesouky HE, Li X, Abutaleb NS, Mohammad H, Seleem MN. Synergistic  
502 interactions of sulfamethoxazole and azole antifungal drugs against emerging multidrug-  
503 resistant *Candida auris*. *Int J Antimicrob Agents.* 2018;52:754-61. doi:  
504 10.1016/j.ijantimicag.2018.08.016.

505

506 39. Vargas-Cruz N, Reitzel RA, Rosenblatt J, Chaftari AM, Wilson Dib R, Hachem R,  
507 Kontoyiannis DP, Raad II. Nitroglycerin-Citrate-Ethanol Catheter Lock Solution Is Highly  
508 Effective for *In Vitro* Eradication of *Candida auris* Biofilm. *Antimicrob Agents Chemother.*  
509 2019;63:e00299-19. doi: 10.1128/AAC.00299-19.



510

511 40. Wall G, Chaturvedi AK, Wormley FL Jr, Wiederhold NP, Patterson HP, Patterson TF,  
512 Lopez-Ribot JL. Screening a Repurposing Library for Inhibitors of Multidrug-Resistant  
513 *Candida auris* Identifies Ebselen as a Repositionable Candidate for Antifungal Drug  
514 Development. *Antimicrob Agents Chemother.* 2018;62:e01084-18. doi: 10.1128/AAC.01084-  
515 18.

516

517 **Table 1** Minimum inhibitory concentrations (MICs) of caspofungin alone and in combination  
 518 with isavuconazole against *Candida auris* planktonic cells and one-day-old biofilms.

| Clades         | Isolates                 | Planktonic cells<br>Median MIC (range) of drug used (50% O.D. reduction in turbidity) |                         |                     |                      | Biofilms<br>Median MIC (range) of drug used (50% O.D. reduction in metabolic activity) |                      |                    |                      |
|----------------|--------------------------|---------------------------------------------------------------------------------------|-------------------------|---------------------|----------------------|----------------------------------------------------------------------------------------|----------------------|--------------------|----------------------|
|                |                          | Alone                                                                                 |                         | In combination      |                      | Alone                                                                                  |                      | In combination     |                      |
|                |                          | Caspofungin (mg/L)                                                                    | Isavuconazole (mg/L)    | Caspofungin (mg/L)  | Isavuconazole (mg/L) | Caspofungin (mg/L)                                                                     | Isavuconazole (mg/L) | Caspofungin (mg/L) | Isavuconazole (mg/L) |
| South Asian    | 10                       | >1 <sup>a</sup>                                                                       | >2 <sup>b</sup> (2- >2) | 0.25 (0.25-0.5)     | 0.015 (0.008-0.015)  | >32 <sup>c</sup>                                                                       | >2 <sup>b</sup>      | 0.5                | 0.015 (0.015-0.06)   |
|                | 12                       | 1                                                                                     | 1 (0.5-1)               | 0.5 (0.015-0.5)     | 0.015 (0.015-0.25)   | >32 <sup>c</sup>                                                                       | >2 <sup>b</sup>      | 0.5                | 0.015 (0.008-0.015)  |
|                | 20                       | >1 <sup>a</sup>                                                                       | 2 (2- >2)               | 1                   | 0.015 (0.015-1)      | >32 <sup>c</sup>                                                                       | >2 <sup>b</sup>      | 0.5                | 0.03                 |
|                | 27                       | >1 <sup>a</sup> (1- >1)                                                               | 1 (0.5- >2)             | 0.25 (0.25-0.5)     | 0.015 (0.015-0.06)   | >32 <sup>c</sup>                                                                       | >2 <sup>b</sup>      | 0.5                | 0.015 (0.008-0.015)  |
|                | 33                       | >1 <sup>a</sup>                                                                       | 0.06                    | 0.015 (0.015-0.03)  | 0.008                | NA                                                                                     | NA                   | NA                 | NA                   |
|                | 82                       | >1 <sup>a</sup>                                                                       | 2                       | 0.25 (0.25-1)       | 0.25 (0.03-0.25)     | >32 <sup>c</sup>                                                                       | >2 <sup>b</sup>      | 4 (4-8)            | 0.06 (0.008-0.06)    |
|                | 164                      | >1 <sup>a</sup>                                                                       | 0.5                     | 0.5 (0.5-1)         | 0.06 (0.03-0.06)     | NA                                                                                     | NA                   | NA                 | NA                   |
|                | 174                      | >1 <sup>a</sup>                                                                       | 0.06                    | 0.015 (0.015-0.25)  | 0.008                | NA                                                                                     | NA                   | NA                 | NA                   |
| 196            | >1 <sup>a</sup>          | 0.06                                                                                  | 0.06 (0.06-0.125)       | 0.008 (0.008-0.015) | NA                   | NA                                                                                     | NA                   | NA                 |                      |
| East Asian     | 15                       | 0.5                                                                                   | 0.5 (0.25-0.5)          | 0.25                | 0.25                 | >32 <sup>c</sup>                                                                       | >2 <sup>b</sup>      | 0.5                | 0.125                |
|                | 12372                    | 1                                                                                     | 0.5                     | 0.125               | 0.008 (0.008-0.015)  | >32 <sup>c</sup>                                                                       | >2 <sup>b</sup>      | 4                  | 1                    |
|                | 12373                    | 0.5                                                                                   | 0.5                     | 0.25                | 0.25 (0.25-0.125)    | NA                                                                                     | NA                   | NA                 | NA                   |
|                | Type strain (NCPF 13029) | 0.5                                                                                   | 0.03                    | 0.015               | 0.008                | NA                                                                                     | NA                   | NA                 | NA                   |
| South African  | 2                        | 1                                                                                     | 0.125 (0.06-0.125)      | 0.015               | 0.008 (0.008-0.015)  | NA                                                                                     | NA                   | NA                 | NA                   |
|                | 185                      | 1                                                                                     | 0.25 (0.125-0.25)       | 0.015               | 0.03 (0.03-0.015)    | NA                                                                                     | NA                   | NA                 | NA                   |
|                | 204                      | 0.5                                                                                   | 0.125 (0.06-0.125)      | 0.015               | 0.03                 | 32 (16-32)                                                                             | >2 <sup>b</sup>      | 0.5                | 0.008                |
|                | 206                      | 1                                                                                     | 0.25 (0.125-0.25)       | 0.015               | 0.008                | NA                                                                                     | NA                   | NA                 | NA                   |
|                | 228                      | 1                                                                                     | 0.06                    | 0.03 (0.015-0.06)   | 0.008 (0.008-0.015)  | 32                                                                                     | >2 <sup>b</sup>      | 0.5                | 0.008 (0.008-0.015)  |
| South American | I-24                     | >1 <sup>a</sup>                                                                       | 1 (0.5-1)               | 0.015 (0.015-1)     | 0.008 (0.008-0.03)   | >32 <sup>c</sup>                                                                       | 0.5                  | 4                  | 0.125                |
|                | I-172                    | 1                                                                                     | 0.5                     | 0.5                 | 0.25                 | >32 <sup>c</sup>                                                                       | 0.5 (0.5-2)          | 16                 | 0.06                 |
|                | 13108                    | >1 <sup>a</sup>                                                                       | 2                       | 1                   | 0.008                | >32 <sup>c</sup>                                                                       | >2 <sup>b</sup>      | >32 <sup>c</sup>   | >2 <sup>b</sup>      |
|                | 13112                    | 0.5                                                                                   | 2                       | 0.015 (0.015-0.03)  | 0.5                  | >32 <sup>c</sup>                                                                       | >2 <sup>b</sup>      | >32 <sup>c</sup>   | >2 <sup>b</sup>      |
|                | 16565                    | 0.5                                                                                   | 0.015                   | 0.015               | 0.008                | 2                                                                                      | 1 (0.5-1)            | 0.5                | 0.06                 |

519

520 <sup>a</sup>MIC is off-scale at >1 mg/L, 2 mg/L (one dilution higher than the highest tested concentration) was used for FICI analysis.

521 <sup>b</sup>MIC is off-scale at >2 mg/L, 4 mg/L (one dilution higher than the highest tested concentration) was used for FICI analysis.

522 <sup>c</sup>MIC is off-scale at >32 mg/L, 64 mg/L (one dilution higher than the highest tested concentration) was used for FICI analysis.

523

524

525

526

527

528 **Table 2** *In vitro* interactions by fractional inhibitory concentration indices (FICIs) of  
 529 caspofungin in combination with isavuconazole against *Candida auris* planktonic cells and  
 530 one-day-old biofilms.  
 531

| Clades         | Isolate                  | Planktonic cells       |                | Biofilms               |                |
|----------------|--------------------------|------------------------|----------------|------------------------|----------------|
|                |                          | FICI                   |                | FICI                   |                |
|                |                          | Median (range) of FICI | Interaction    | Median (range) of FICI | Interaction    |
| South Asian    | 10                       | 0.28 (0.28-0.312)      | <b>Synergy</b> | 0.037 (0.037-0.068)    | <b>Synergy</b> |
|                | 12                       | 0.03 (0.03-1)          | <b>Synergy</b> | 0.076 (0.023-0.076)    | <b>Synergy</b> |
|                | 20                       | 0.51 (0.51-0.75)       | Indifferent    | 0.023                  | <b>Synergy</b> |
|                | 27                       | 0.5 (0.25-0.5)         | <b>Synergy</b> | 0.029 (0.029-0.038)    | <b>Synergy</b> |
|                | 33                       | 0.313 (0.258-0.375)    | <b>Synergy</b> | NA                     | NA             |
|                | 82                       | 0.375 (0.25-0.51)      | <b>Synergy</b> | 0.155 (0.133-0.155)    | <b>Synergy</b> |
|                | 164                      | 0.62 (0.56-0.75)       | Indifferent    | NA                     | NA             |
|                | 174                      | 0.383 (0.375-0.5)      | <b>Synergy</b> | NA                     | NA             |
|                | 196                      | 0.53 (0.5-0.625)       | Indifferent    | NA                     | NA             |
| East Asian     | 15                       | 1 (0.75-1)             | Indifferent    | 0.5                    | <b>Synergy</b> |
|                | 12372                    | 0.37 (0.31-0.5)        | <b>Synergy</b> | 0.375 (0.187-0.375)    | <b>Synergy</b> |
|                | 12373                    | 0.5 (0.5-1)            | <b>Synergy</b> | NA                     | NA             |
|                | Type strain (NCPF 13029) | 0.296                  | <b>Synergy</b> | NA                     | NA             |
| South African  | 2                        | 0.37 (0.255-0.49)      | <b>Synergy</b> | NA                     | NA             |
|                | 185                      | 0.245 (0.245-0.255)    | <b>Synergy</b> | NA                     | NA             |
|                | 204                      | 0.51 (0.49-0.54)       | Indifferent    | 0.019                  | <b>Synergy</b> |
|                | 206                      | 0.255 (0.255-0.3)      | <b>Synergy</b> | NA                     | NA             |
|                | 228                      | 0.53 (0.5-0.625)       | Indifferent    | 0.03 (0.03-0.06)       | <b>Synergy</b> |
| South American | I-24                     | 0.51                   | Indifferent    | 0.5 (0.5-0.56)         | <b>Synergy</b> |
|                | I-172                    | 1                      | Indifferent    | 0.31 (0.28-0.37)       | <b>Synergy</b> |
|                | 13108                    | 0.5                    | <b>Synergy</b> | 2                      | Indifferent    |
|                | 13112                    | 0.37 (0.37-0.5)        | <b>Synergy</b> | 2                      | Indifferent    |
|                | 16565                    | 0.563 (0.563-0.593)    | Indifferent    | 0.31                   | <b>Synergy</b> |

532

533

534

535 **Figure legends**

536 **Figure 1**

537 Effect of caspofungin in combination with isavuconazole against planktonic (A-D) and sessile  
538 (E-H) *Candida auris* isolates using MacSynergy II analysis. Positive values show synergy,  
539 while negative values indicate antagonism at given concentrations. The volumes are  
540 calculated at the 95% confidence interval.

541 **Figure 2**

542 Kidney tissue burden of deeply neutropenic BALB/c mice infected intravenously with  
543 *Candida auris* 12 (A) and 13112 (B) isolates. Daily intraperitoneal caspofungin (CAS)  
544 (1mg/kg/day) and isavuconazole (ISA) (20 mg/kg/day) treatment was started 24 hours after  
545 the infection. Tissue burden experiments were performed on day 6 post-infection. Bars  
546 represent means  $\pm$  standard error of mean. \*\*\* corresponds to  $p < 0.001$  compared with the  
547 control population.

South Asian (planktonic)

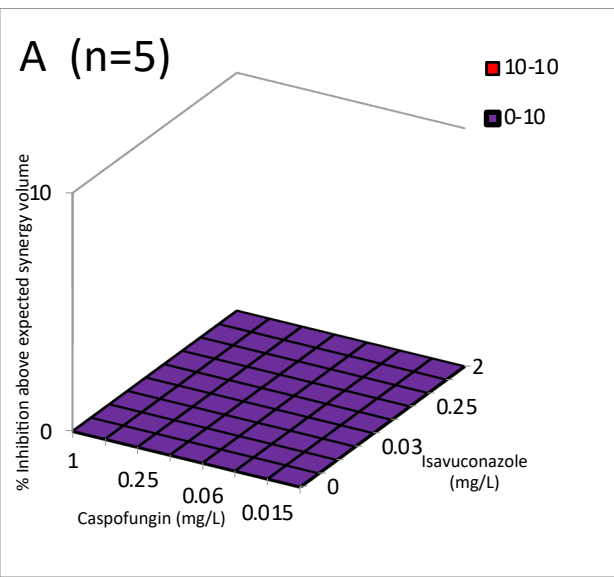

South American (planktonic)

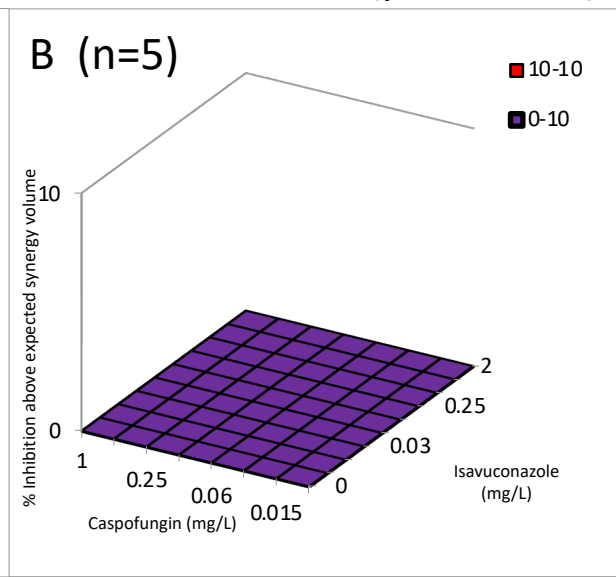

South African (planktonic)

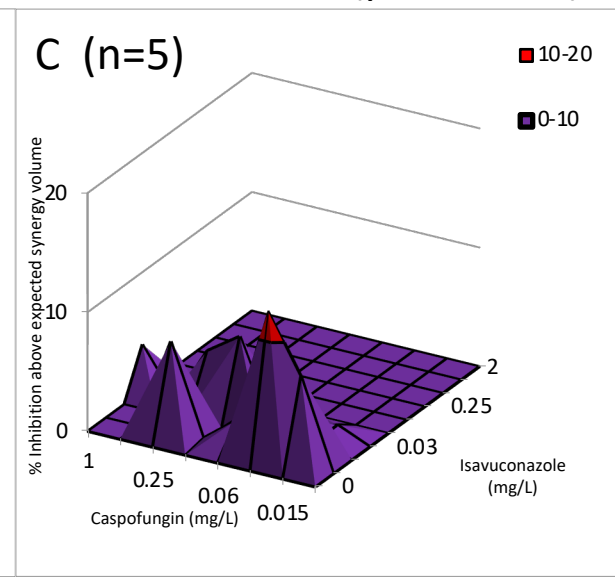

East Asian (planktonic)

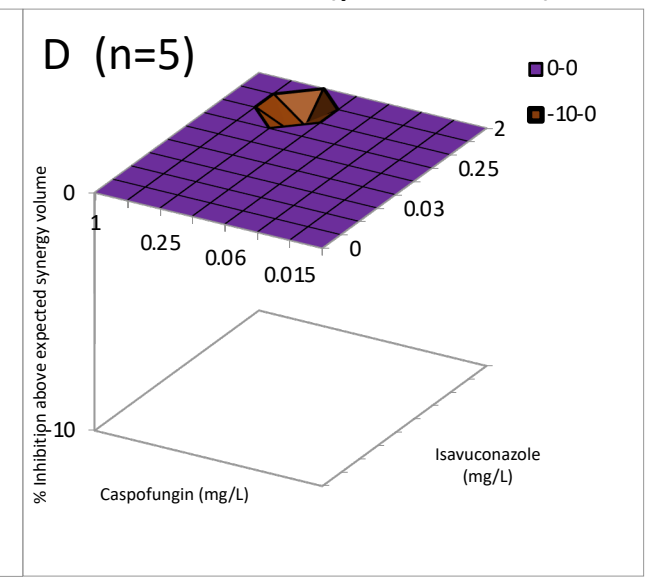

South Asian (biofilm)

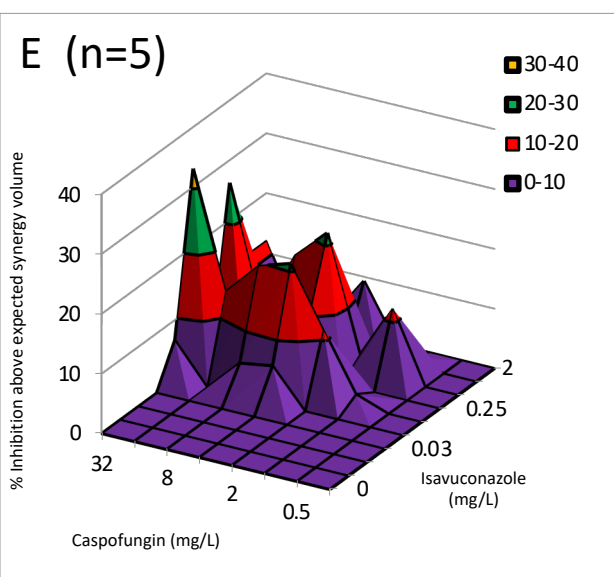

South American (biofilm)

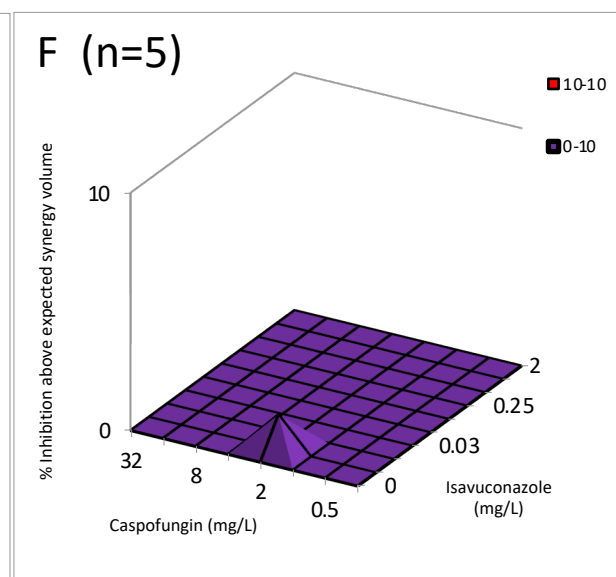

South African (biofilm)

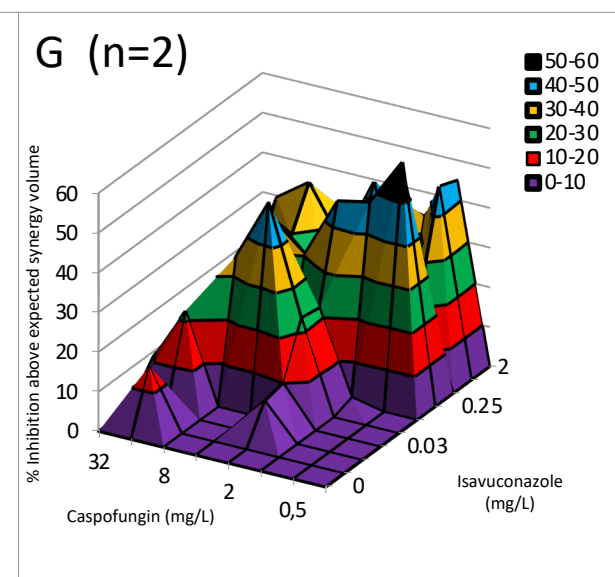

East Asian (biofilm)

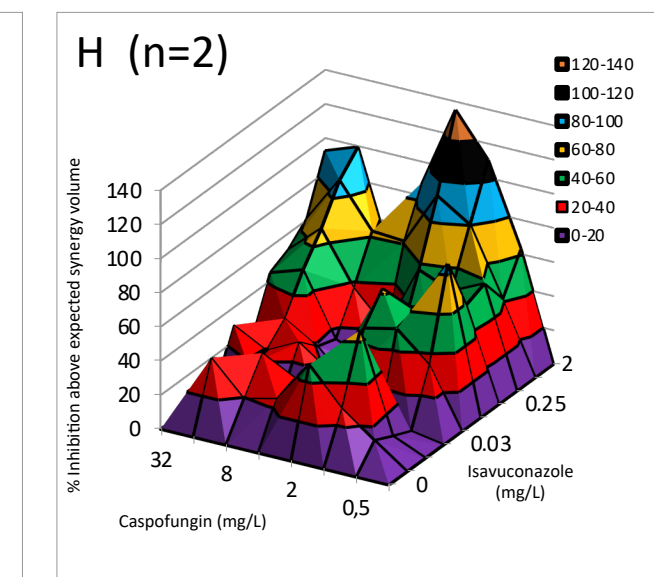

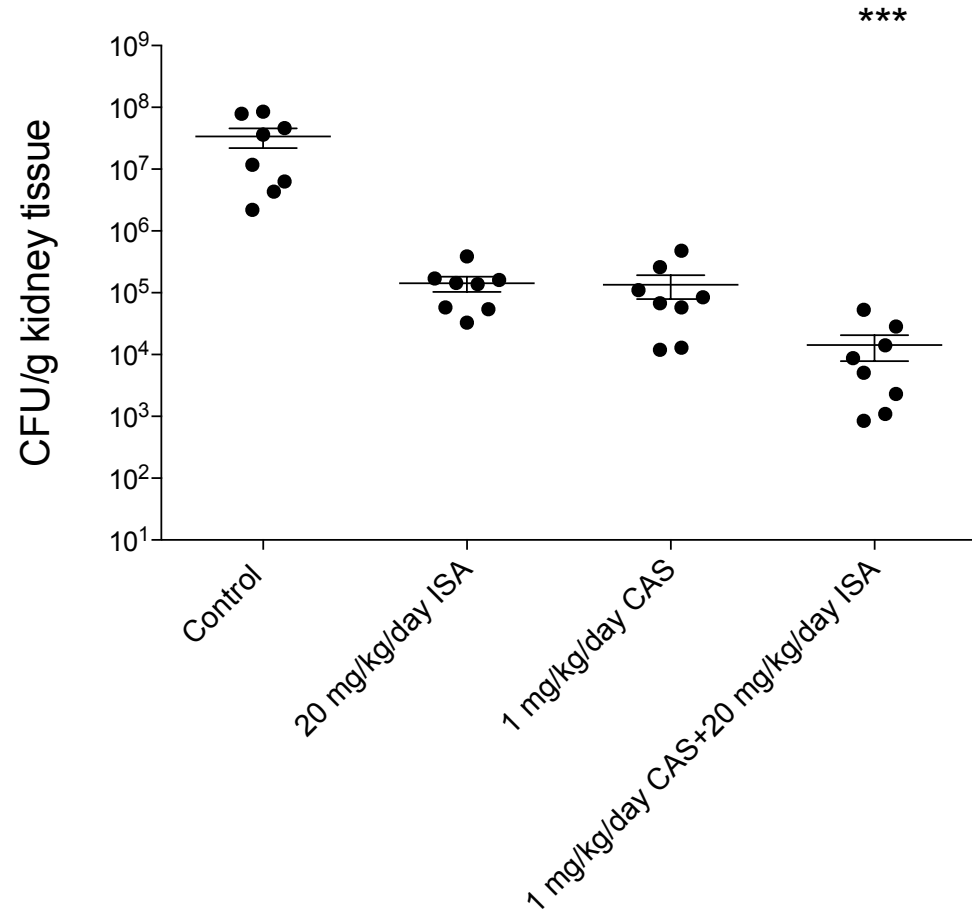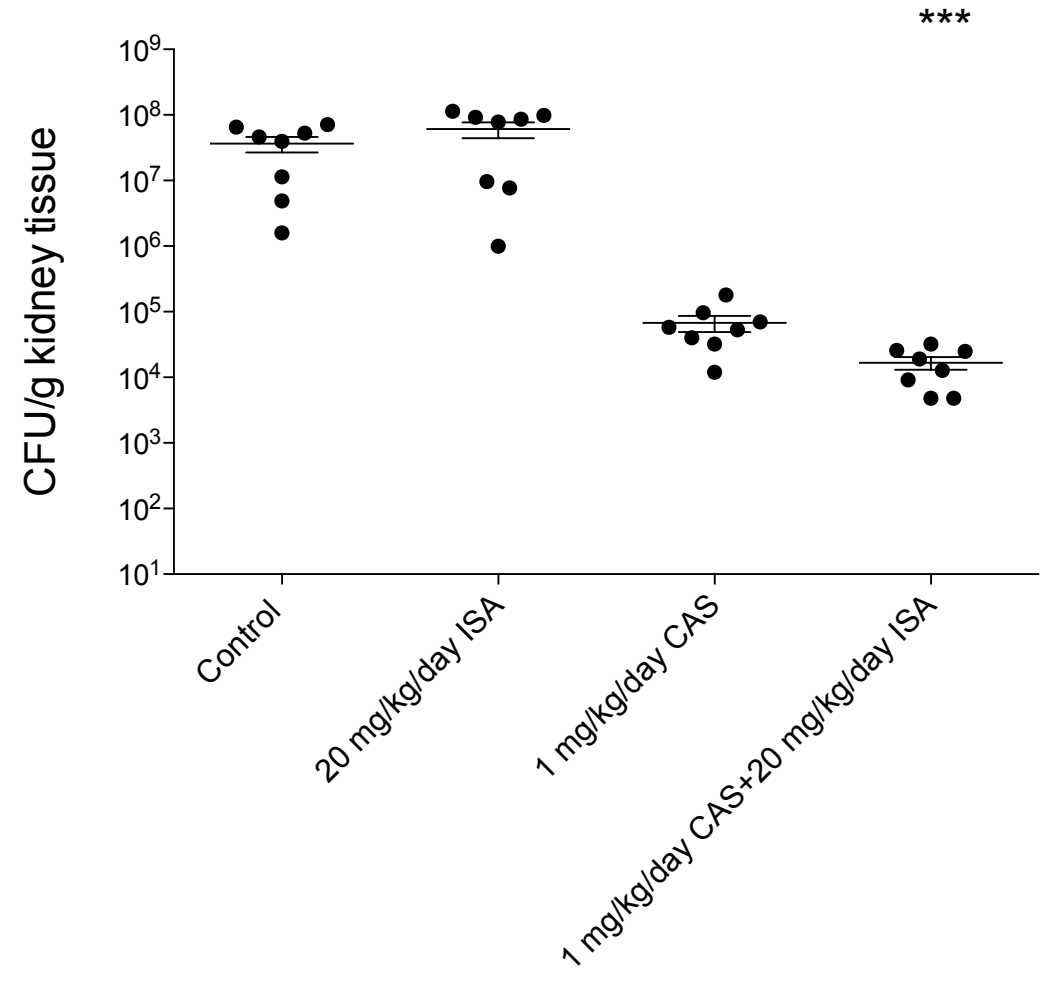

Source: https://biorxiv.org/content/10.1101/2021.03.08.434267v1.full.pdf
